# Supplementary material for: Synthesis and characterization of isotopically labeled silver nanoparticles for tracing studies
Source: Royal Society of Chemistry journal article supplement (doi:10.1039/c3en00100h), 2014-01-01
Supplement: c3en00100h1.pdf [file c3en00100h1.pdf]

# **Synthesis and characterization of isotopically labeled silver nanoparticles for tracing studies**

Adam Laycock, Björn Stolpe, Isabella Römer, Agnieszka Dybowska, Eugenia Valsami-Jones,  
Jamie R. Lead, Mark Rehkämper

## **Supplementary Material**

Student's t-test data

## Particles sizes and Proportional difference from the mean (PDMS) determined by DLS

\* Best data = the two largest outliers were removed prior to statistical evaluation

PDMS = (MS - SamS) / MS

MS = Mean particle size for all particles with the same target size

SamS = Measured particle size of sample

### Pristine Particles:

#### Particle Batch

|                     | All Data      |       |      | Best Data     |       |
|---------------------|---------------|-------|------|---------------|-------|
|                     | Diameter (nm) | PDMS  | PDI  | Diameter (nm) | PDMS  |
| <b>AgNP1 - 30nm</b> |               |       |      |               |       |
| Nat-AgNP1-May12-F   | 41.6          | 0.28  | 0.25 |               |       |
| 107-AgNP1-May12-F   | 29.3          | -0.10 | 0.22 | 29.3          | -0.05 |
| Nat-AgNP1-May12-IC  | 35.5          | 0.09  | 0.26 | 35.5          | 0.15  |
| 107-AgNP1-May12-IC  | 31.2          | -0.04 | 0.16 | 31.2          | 0.01  |
| Nat-AgNP1-Oct12-F   | 26.5          | -0.19 | 0.13 | 26.5          | -0.14 |
| 107-AgNP1-Oct12-F   | 31.2          | -0.04 | 0.18 | 31.2          | 0.01  |
| <b>Average</b>      | <b>32.6</b>   |       |      | <b>30.7</b>   |       |
| <b>SD</b>           | <b>4.9</b>    |       |      | <b>2.9</b>    |       |
| <b>AgNP2 - 20nm</b> |               |       |      |               |       |
| Nat-AgNP2-May12-F   | 20.7          | 0.06  | 0.33 | 20.7          | 0.02  |
| 107-AgNP2-May12-F   | 16.7          | -0.15 | 0.25 | 16.7          | -0.17 |
| Nat-AgNP2-May12-IC  | 17.2          | -0.12 | 0.28 | 17.2          | -0.15 |
| 107-AgNP2-May12-IC  | 16.3          | -0.17 | 0.27 |               |       |
| Nat-AgNP2-Oct12-F   | 22.6          | 0.16  | 0.15 | 22.6          | 0.12  |
| 107-AgNP2-Oct12-F   | 23.9          | 0.22  | 0.20 | 23.9          | 0.18  |
| <b>Average</b>      | <b>19.6</b>   |       |      | <b>20.2</b>   |       |
| <b>SD</b>           | <b>3.0</b>    |       |      | <b>2.9</b>    |       |
| <b>AgNP3 - 17nm</b> |               |       |      |               |       |
| Nat-AgNP3-May12-F   | 17.1          | -0.18 | 0.20 | 17.1          | -0.12 |
| 107-AgNP3-May12-F   | 24.3          | 0.16  | 0.24 | 24.3          | 0.25  |
| Nat-AgNP3-May12-IC  | 18.2          | -0.13 | 0.23 | 18.2          | -0.07 |
| 107-AgNP3-May12-IC  | 20.6          | -0.02 | 0.29 | 20.6          | 0.06  |
| Nat-AgNP3-Oct12-F   | 17.2          | -0.18 | 0.25 | 17.2          | -0.12 |
| 107-AgNP3-Oct12-F   | 28.1          | 0.34  | 0.44 |               |       |
| <b>Average</b>      | <b>20.9</b>   |       |      | <b>19.5</b>   |       |
| <b>SD</b>           | <b>4.1</b>    |       |      | <b>2.7</b>    |       |

## Aged Particles

| Particle Batch      | Storage (months) | All Data      |       |      | Best Data     |       |
|---------------------|------------------|---------------|-------|------|---------------|-------|
|                     |                  | Diameter (nm) | PDMS  | PDI  | Diameter (nm) | PDMS  |
| <b>AgNP1 - 30nm</b> |                  |               |       |      |               |       |
| Nat-AgNP1-May12-F   | 12               | 41.5          | 0.24  | 0.25 |               |       |
| 107-AgNP1-May12-F   | 12               | 29.7          | -0.11 | 0.20 | 29.7          | -0.05 |
| Nat-AgNP1-May12-IC  | 12               | 35.3          | 0.06  | 0.23 | 35.3          | 0.13  |
| 107-AgNP1-May12-IC  |                  |               |       |      |               |       |
| Nat-AgNP1-Oct12-F   | 6                | 26.8          | -0.20 | 0.11 | 26.8          | -0.15 |
| 107-AgNP1-Oct12-F   | 6                | 33.7          | 0.01  | 0.22 | 33.7          | 0.07  |
| <b>Average</b>      |                  | <b>33.4</b>   |       |      | <b>31.4</b>   |       |
| <b>SD</b>           |                  | <b>5.6</b>    |       |      | <b>3.3</b>    |       |
| <b>AgNP2 - 20nm</b> |                  |               |       |      |               |       |
| Nat-AgNP2-May12-F   | 12               | 19.7          | 0.02  | 0.25 | 19.7          | 0.02  |
| 107-AgNP2-May12-F   | 12               | 14.6          | -0.24 | 0.34 | 14.6          | -0.24 |
| Nat-AgNP2-May12-IC  | 8                | 16.8          | -0.13 | 0.35 | 16.8          | -0.13 |
| 107-AgNP2-May12-IC  | 12               | 17.5          | -0.09 | 0.18 | 17.5          | -0.09 |
| Nat-AgNP2-Oct12-F   | 6                | 22.9          | 0.19  | 0.10 | 22.9          | 0.19  |
| 107-AgNP2-Oct12-F   | 6                | 24.1          | 0.25  | 0.18 | 24.1          | 0.25  |
| <b>Average</b>      |                  | <b>19.3</b>   |       |      | <b>19.3</b>   |       |
| <b>SD</b>           |                  | <b>3.4</b>    |       |      | <b>3.4</b>    |       |
| <b>AgNP3 - 17nm</b> |                  |               |       |      |               |       |
| Nat-AgNP3-May12-F   |                  |               |       |      |               |       |
| 107-AgNP3-May12-F   |                  |               |       |      |               |       |
| Nat-AgNP3-May12-IC  | 12               | 16.8          | -0.32 | 0.31 | 16.8          | -0.14 |
| 107-AgNP3-May12-IC  | 12               | 24.1          | -0.03 | 0.21 | 24.1          | 0.24  |
| Nat-AgNP3-Oct12-F   | 6                | 32.5          | 0.31  | 0.52 | 32.5          | 0.67  |
| 107-AgNP3-Oct12-F   | 6                | 26.1          | 0.05  | 0.39 |               |       |
| <b>Average</b>      |                  | <b>24.9</b>   |       |      | <b>24.5</b>   |       |
| <b>SD</b>           |                  | <b>5.6</b>    |       |      | <b>6.4</b>    |       |

Nat AgNPs vs. 107AgNPs for AgNP1, 2 & 3  
Using particle size

|                       | All Data    | Best Data   |
|-----------------------|-------------|-------------|
| <b>AgNP1</b>          |             |             |
| Nat-May12-F           | 41.6        |             |
| Nat-May12-IC          | 35.5        | 35.5        |
| Nat-Oct12-F           | 26.5        | 26.5        |
| Average               | 34.5        | 31.0        |
| SD                    | 6.2         | 4.5         |
| 107-May12-F           | 29.3        | 29.3        |
| 107-May12-IC          | 31.2        | 31.2        |
| 107-Oct12-F           | 31.2        | 31.2        |
| Average               | 30.6        | 30.6        |
| SD                    | 0.9         | 0.9         |
| <b>t-test p-value</b> | <b>0.46</b> | <b>0.94</b> |

Nat AgNPs vs. 107AgNPs for AgNP1, 2 & 3  
Using proportional difference from the mean

|                       | All Data    | Best Data   |
|-----------------------|-------------|-------------|
| <b>AgNP1</b>          |             |             |
| Nat-May12-F           | 0.28        |             |
| Nat-May12-IC          | 0.09        | 0.15        |
| Nat-Oct12-F           | -0.19       | -0.14       |
| Average               | 0.06        | 0.01        |
| SD                    | 0.19        | 0.15        |
| 107-May12-F           | -0.10       | -0.05       |
| 107-May12-IC          | -0.04       | 0.01        |
| 107-Oct12-F           | -0.04       | 0.01        |
| Average               | -0.06       | -0.01       |
| SD                    | 0.03        | 0.03        |
| <b>t-test p-value</b> | <b>0.46</b> | <b>0.94</b> |

|                       | All Data    |
|-----------------------|-------------|
| <b>AgNP2</b>          |             |
| Nat-May12-F           | 20.7        |
| Nat-May12-IC          | 17.2        |
| Nat-Oct12-F           | 22.6        |
| Average               | 20.2        |
| SD                    | 2.2         |
| 107-May12-F           | 16.7        |
| 107-May12-IC          | 16.3        |
| 107-Oct12-F           | 23.9        |
| Average               | 19.0        |
| SD                    | 3.5         |
| <b>t-test p-value</b> | <b>0.71</b> |

|                       | All Data    |
|-----------------------|-------------|
| <b>AgNP2</b>          |             |
| Nat-May12-F           | 0.06        |
| Nat-May12-IC          | -0.12       |
| Nat-Oct12-F           | 0.16        |
| Average               | 0.03        |
| SD                    | 0.11        |
| 107-May12-F           | -0.15       |
| 107-May12-IC          | -0.17       |
| 107-Oct12-F           | 0.22        |
| Average               | -0.03       |
| SD                    | 0.18        |
| <b>t-test p-value</b> | <b>0.71</b> |

|                       | All Data    | Best Data   |
|-----------------------|-------------|-------------|
| <b>AgNP3</b>          |             |             |
| Nat-May12-F           | 17.1        | 17.1        |
| Nat-May12-IC          | 18.2        | 18.2        |
| Nat-Oct12-F           | 17.2        | 17.2        |
| Average               | 17.5        | 17.5        |
| SD                    | 0.5         | 0.5         |
| 107-May12-F           | 24.3        | 24.3        |
| 107-May12-IC          | 20.6        | 20.6        |
| 107-Oct12-F           | 28.1        |             |
| Average               | 24.3        | 22.5        |
| SD                    | 3.1         | 1.9         |
| <b>t-test p-value</b> | <b>0.08</b> | <b>0.22</b> |

|                       | All Data    | Best Data   |
|-----------------------|-------------|-------------|
| <b>AgNP3</b>          |             |             |
| Nat-May12-F           | -0.18       | -0.12       |
| Nat-May12-IC          | -0.13       | -0.07       |
| Nat-Oct12-F           | -0.18       | -0.12       |
| Average               | -0.16       | -0.10       |
| SD                    | 0.02        | 0.03        |
| 107-May12-F           | 0.16        | 0.25        |
| 107-May12-IC          | -0.02       | 0.06        |
| 107-Oct12-F           | 0.34        |             |
| Average               | 0.16        | 0.15        |
| SD                    | 0.15        | 0.09        |
| <b>t-test p-value</b> | <b>0.08</b> | <b>0.22</b> |

Nat Ag vs. 107AgNPs for each synthesis occasion  
Using proportional difference from the mean

|                       | All Data    | Best Data   |
|-----------------------|-------------|-------------|
| <b>May12-F</b>        |             |             |
| AgNP1                 | 0.28        |             |
| AgNP2                 | 0.06        | 0.02        |
| AgNP3                 | -0.18       | -0.12       |
| Average               | 0.05        | -0.05       |
| SD                    | 0.19        | 0.07        |
| 107AgNP1              | -0.10       | -0.05       |
| 107AgNP2              | -0.15       | -0.17       |
| 107AgNP3              | 0.16        | 0.25        |
| Average               | -0.03       | 0.01        |
| SD                    | 0.14        | 0.18        |
| <b>t-test p-value</b> | <b>0.66</b> | <b>0.72</b> |

|                       | All Data    | Best Data   |
|-----------------------|-------------|-------------|
| <b>May12-IC</b>       |             |             |
| AgNP1                 | 0.09        | 0.15        |
| AgNP2                 | -0.12       | -0.15       |
| AgNP3                 | -0.13       | -0.07       |
| Average               | -0.05       | -0.02       |
| SD                    | 0.10        | 0.13        |
| 107AgNP1              | -0.04       | 0.01        |
| 107AgNP2              | -0.17       | 0.00        |
| 107AgNP3              | -0.02       | 0.06        |
| Average               | -0.07       | 0.02        |
| SD                    | 0.07        | 0.02        |
| <b>t-test p-value</b> | <b>0.82</b> | <b>0.68</b> |

|                       | All Data    | Best Data   |
|-----------------------|-------------|-------------|
| <b>Oct12-F</b>        |             |             |
| AgNP1                 | -0.19       | -0.14       |
| AgNP2                 | 0.16        | 0.12        |
| AgNP3                 | -0.18       | -0.12       |
| Average               | -0.07       | -0.05       |
| SD                    | 0.16        | 0.12        |
| 107AgNP1              | -0.04       | 0.01        |
| 107AgNP2              | 0.22        | 0.18        |
| 107AgNP3              | 0.34        |             |
| Average               | 0.17        | 0.10        |
| SD                    | 0.16        | 0.08        |
| <b>t-test p-value</b> | <b>0.20</b> | <b>0.32</b> |

Nat AgNPs vs. 107AgNPs for all factors  
Using proportional difference from the mean

|                       | All Data    | Best Data   |
|-----------------------|-------------|-------------|
| <b>Nat Ag</b>         |             |             |
| NatAgNP1-May12-F      | 0.28        |             |
| NatAgNP1-May12-IC     | 0.09        | 0.15        |
| NatAgNP1-Oct12-F      | -0.19       | -0.14       |
| NatAgNP2-May12-F      | 0.06        | 0.02        |
| NatAgNP2-May12-IC     | -0.12       | -0.15       |
| NatAgNP2-Oct12-F      | 0.16        | 0.12        |
| NatAgNP3-May12-F      | -0.18       | -0.12       |
| NatAgNP3-May12-IC     | -0.13       | -0.07       |
| NatAgNP3-Oct12-F      | -0.18       | -0.12       |
| Average               | -0.02       | -0.04       |
| SD                    | 0.16        | 0.11        |
| <b>107 Ag</b>         |             |             |
| 107AgNP1-May12-F      | -0.10       | -0.05       |
| 107AgNP1-May12-IC     | -0.04       | 0.01        |
| 107AgNP1-Oct12-F      | -0.04       | 0.01        |
| 107AgNP2-May12-F      | -0.15       | -0.17       |
| 107AgNP2-May12-IC     | -0.17       | 0.00        |
| 107AgNP2-Oct12-F      | 0.22        | 0.18        |
| 107AgNP3-May12-F      | 0.16        | 0.25        |
| 107AgNP3-May12-IC     | -0.02       | 0.06        |
| 107AgNP3-Oct12-F      | 0.34        |             |
| Average               | 0.02        | 0.04        |
| SD                    | 0.17        | 0.12        |
| <b>t-test p-value</b> | <b>0.57</b> | <b>0.26</b> |

Synthesis at FENAC vs. Imperial

Using proportional difference from the mean

|                       | All Data    | Best Data   |
|-----------------------|-------------|-------------|
| <b>FENAC</b>          |             |             |
| NatAgNP1-May12        | 0.28        |             |
| NatAgNP2-May12        | 0.06        | 0.02        |
| NatAgNP3-May12        | -0.18       | -0.12       |
| NatAgNP1-Oct12        | -0.19       | -0.14       |
| NatAgNP2-Oct12        | 0.16        | 0.12        |
| NatAgNP3-Oct12        | -0.18       | -0.12       |
| 107AgNP1-May12        | -0.10       | -0.05       |
| 107AgNP2-May12        | -0.15       | -0.17       |
| 107AgNP3-May12        | 0.16        | 0.25        |
| 107AgNP1-Oct12        | -0.04       | 0.01        |
| 107AgNP2-Oct12        | 0.22        | 0.18        |
| 107AgNP3-Oct12        | 0.34        |             |
| Average               | 0.03        | -0.05       |
| SD                    | 0.19        | 0.07        |
| <b>Imperial</b>       |             |             |
| NatAgNP1-May12        | 0.09        | 0.15        |
| NatAgNP2-May12        | -0.12       | -0.15       |
| NatAgNP3-May12        | -0.13       | -0.07       |
| 107AgNP1-May12        | -0.04       | 0.01        |
| 107AgNP2-May12        | -0.17       | 0.00        |
| 107AgNP3-May12        | -0.02       | 0.06        |
| Average               | -0.06       | 0.00        |
| SD                    | 0.09        | 0.09        |
| <b>t-test p-value</b> | <b>0.18</b> | <b>0.96</b> |

Synthesis by AL vs. BS

Using proportional difference from the mean

|                       | All Data    | Best Data   |
|-----------------------|-------------|-------------|
| <b>AL</b>             |             |             |
| NatAgNP1-May12-F      | 0.28        |             |
| NatAgNP2-May12-F      | 0.06        | 0.02        |
| NatAgNP3-May12-F      | -0.18       | -0.12       |
| 107AgNP1-May12-F      | -0.10       | -0.05       |
| 107AgNP2-May12-F      | -0.15       | -0.17       |
| 107AgNP3-May12-F      | 0.16        | 0.25        |
| NatAgNP1-May12-IC     | 0.09        | 0.15        |
| NatAgNP2-May12-IC     | -0.12       | -0.15       |
| NatAgNP3-May12-IC     | -0.13       | -0.07       |
| 107AgNP1-May12-IC     | -0.04       | 0.01        |
| 107AgNP2-May12-IC     | -0.17       | 0.00        |
| 107AgNP3-May12-IC     | -0.02       | 0.06        |
| Average               | -0.03       | -0.05       |
| SD                    | 0.14        | 0.07        |
| <b>BS</b>             |             |             |
| NatAgNP1-Oct12        | -0.19       | -0.14       |
| NatAgNP2-Oct12        | 0.16        | 0.12        |
| NatAgNP3-Oct12        | -0.18       | -0.12       |
| 107AgNP1-Oct12        | -0.04       | 0.01        |
| 107AgNP2-Oct12        | 0.22        | 0.18        |
| 107AgNP3-Oct12        | 0.34        |             |
| Average               | 0.05        | 0.01        |
| SD                    | 0.20        | 0.13        |
| <b>t-test p-value</b> | <b>0.45</b> | <b>0.76</b> |

**NatAg Vs 107Ag for all factors  
Using PDIs**

|                       | All Data    |
|-----------------------|-------------|
| <b>Nat Ag</b>         |             |
| NatAgNP1-May12-F      | 0.25        |
| NatAgNP1-May12-IC     | 0.26        |
| NatAgNP1-Oct12-F      | 0.13        |
| NatAgNP2-May12-F      | 0.33        |
| NatAgNP2-May12-IC     | 0.28        |
| NatAgNP2-Oct12-F      | 0.15        |
| NatAgNP3-May12-F      | 0.20        |
| NatAgNP3-May12-IC     | 0.23        |
| NatAgNP3-Oct12-F      | 0.25        |
| <br>                  |             |
| Average               | 0.23        |
| SD                    | 0.06        |
| <br>                  |             |
| <b>107Ag</b>          |             |
| 107AgNP1-May12-F      | 0.22        |
| 107AgNP1-May12-IC     | 0.16        |
| 107AgNP1-Oct12-F      | 0.18        |
| 107AgNP2-May12-F      | 0.25        |
| 107AgNP2-May12-IC     | 0.27        |
| 107AgNP2-Oct12-F      | 0.20        |
| 107AgNP3-May12-F      | 0.24        |
| 107AgNP3-May12-IC     | 0.29        |
| 107AgNP3-Oct12-F      | 0.44        |
| <br>                  |             |
| Average               | 0.25        |
| SD                    | 0.08        |
| <br>                  |             |
| <b>t-test p-value</b> | <b>0.59</b> |

**Pristine Vs Aged  
Using PDIs**

|                       | All Data    |
|-----------------------|-------------|
| <b>Pristine</b>       |             |
| Nat-AgNP1-May12-F     | 0.25        |
| 107-AgNP1-May12-F     | 0.22        |
| Nat-AgNP1-May12-IC    | 0.26        |
| 107-AgNP1-May12-IC    | 0.16        |
| Nat-AgNP1-Oct12-F     | 0.13        |
| 107-AgNP1-Oct12-F     | 0.18        |
| Nat-AgNP2-May12-F     | 0.33        |
| 107-AgNP2-May12-F     | 0.25        |
| Nat-AgNP2-May12-IC    | 0.28        |
| 107-AgNP2-May12-IC    | 0.27        |
| Nat-AgNP2-Oct12-F     | 0.15        |
| 107-AgNP2-Oct12-F     | 0.20        |
| Nat-AgNP3-May12-F     | 0.20        |
| 107-AgNP3-May12-F     | 0.24        |
| Nat-AgNP3-May12-IC    | 0.23        |
| 107-AgNP3-May12-IC    | 0.29        |
| Nat-AgNP3-Oct12-F     | 0.25        |
| 107-AgNP3-Oct12-F     | 0.44        |
| <br>                  |             |
| Average               | 0.24        |
| SD                    | 0.07        |
| <br>                  |             |
| <b>Aged</b>           |             |
| Nat-AgNP1-May12-F     | 0.25        |
| 107-AgNP1-May12-F     | 0.20        |
| Nat-AgNP1-May12-IC    | 0.23        |
| Nat-AgNP1-Oct12-F     | 0.11        |
| 107-AgNP1-Oct12-F     | 0.22        |
| Nat-AgNP2-May12-F     | 0.25        |
| 107-AgNP2-May12-F     | 0.34        |
| Nat-AgNP2-May12-IC    | 0.35        |
| 107-AgNP2-May12-IC    | 0.18        |
| Nat-AgNP2-Oct12-F     | 0.10        |
| 107-AgNP2-Oct12-F     | 0.18        |
| Nat-AgNP3-May12-IC    | 0.31        |
| 107-AgNP3-May12-IC    | 0.21        |
| Nat-AgNP3-Oct12-F     | 0.52        |
| 107-AgNP3-Oct12-F     | 0.39        |
| <br>                  |             |
| Average               | 0.27        |
| SD                    | 0.12        |
| <br>                  |             |
| <b>t-test p-value</b> | <b>0.65</b> |
